RESEARCH ARTICLE

# Enterococcal Infective Endocarditis following Periodontal Disease in Dogs

Teresa Semedo-Lemsaddek, Marta Tavares, Berta São Braz, Luís Tavares, Manuela Oliveira\*

Interdisciplinary Centre of Research in Animal Health (CIISA), Faculty of Veterinary Medicine, University of Lisbon, Avenida da Universidade Técnica, 1300–477 Lisboa, Portugal

\* [moliveira@fmv.ulisboa.pt](mailto:moliveira@fmv.ulisboa.pt)

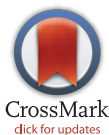

**OPEN ACCESS**

**Citation:** Semedo-Lemsaddek T, Tavares M, São Braz B, Tavares L, Oliveira M (2016) Enterococcal Infective Endocarditis following Periodontal Disease in Dogs. PLoS ONE 11(1): e0146860. doi:10.1371/journal.pone.0146860

**Editor:** Patrick M Schlievert, University of Iowa Carver College of Medicine, UNITED STATES

**Received:** August 11, 2015

**Accepted:** December 21, 2015

**Published:** January 11, 2016

**Copyright:** © 2016 Semedo-Lemsaddek et al. This is an open access article distributed under the terms of the [Creative Commons Attribution License](https://creativecommons.org/licenses/by/4.0/), which permits unrestricted use, distribution, and reproduction in any medium, provided the original author and source are credited.

**Data Availability Statement:** All relevant data are within the paper and its Supporting Information files.

**Funding:** This study was performed on “Centro de Investigação Interdisciplinar em Sanidade Animal” (CIISA/FMV) from Faculdade de Medicina Veterinária da Universidade de Lisboa (Faculty of Veterinary Medicine, University of Lisbon), through Project UID/CVT/00276/2013 from “Fundação para a Ciência e Tecnologia - FCT”. Teresa Semedo-Lemsaddek was financially supported by Program “Ciência” from FCT. The funders had no role in study design, data collection and analysis, decision to publish, or preparation of the manuscript.

## Abstract

In humans, one of the major factors associated with infective endocarditis (IE) is the concurrent presence of periodontal disease (PD). However, in veterinary medicine, the relevance of PD in the evolution of dogs’ endocarditis remains poorly understood. In order to try to establish a correlation between mouth-associated *Enterococcus* spp. and infective endocarditis in dogs, the present study evaluated the presence and diversity of enterococci in the gum and heart of dogs with PD. Samples were collected during necropsy of 32 dogs with PD and visually diagnosed with IE, which died of natural causes or euthanasia. Enterococci were isolated, identified and further characterized by Pulsed-Field Gel Electrophoresis (PFGE); susceptibility to antimicrobial agents and pathogenicity potential was also evaluated. In seven sampled animals, PFGE-patterns, resistance and virulence profiles were found to be identical between mouth and heart enterococci obtained from the same dog, allowing the establishment of an association between enterococcal periodontal disease and endocarditis in dogs. These findings represent a crucial step towards understanding the pathogenesis of PD-driven IE, and constitute a major progress in veterinary medicine.

## Introduction

Infective endocarditis (IE) is an important medical condition in dogs, with high morbidity and mortality rates. Although considered an uncommon disease, with a prevalence ranging from 0.09 to 6.6% [1], its true incidence is undoubtedly underestimated, as its final *in vivo* diagnosis is only possible after echocardiography, by detection of characteristic oscillating vegetative lesions in cardiac valves and valvular insufficiency [1], [2].

In dogs, as well as in humans, IE requires an initial damage of the mitral and aortic valves endothelium, followed by platelet-fibrin deposition and bacterial colonization and adherence [1]. Disease evolution may promote acute congestive heart failure, thromboembolic disease and arrhythmias [1], [3]. IE prognosis depends on the pathogenic profile of associated bacteria, infection severity and affected valves, but it is usually poor. Treatment is only efficient in the

**Competing Interests:** The authors have declared that no competing interests exist.

early stages of disease and it usually requires the long-term administration of broad-spectrum antibiotics [1].

One major factor related to human IE is the concurrent presence of periodontal disease (PD) [3–6]. In veterinary medicine, this association is considered to be relevant, but research aiming to confirm this link is scarce, most being observational and retrospective [7], [8]. Such studies would be of major importance, as PD is one of the most widespread diseases in dogs, with a prevalence of 44 to 80% [9], [10].

PD has a multifactorial aetiology, depending on several factors, related with the host and the environment [5]. It requires the formation of a plaque, defined as a microbial biofilm in the oral cavity that leads to the inflammation of tooth supporting structures, progressing from a mild gingivitis to severe periodontitis reaching the periodontal ligament and alveolar bone [5], [7], [9]. At this stage, bacteria may disseminate to other organs via bloodstream, causing systemic diseases, including IE [7].

Several bacterial species that colonize humans' oral cavity have been associated with PD-driven IE, including *Enterococcus* spp. [6], [11–13], also frequently present in the oral cavity of dogs [14]. However, the role of enterococcal PD in IE evolution remains unclear, although this bacterial genus has already been described as the third most common cause of bacterial endocarditis in humans [13], [15].

The present study investigated the possible association between periodontitis and infective endocarditis, by evaluating the presence and genomic relatedness of *Enterococcus* spp. present in the gum and heart of dogs with PD.

## Material and Methods

Swab samples from mitral/tricuspid valves and gums were collected at a private veterinary hospital located in Cascais, Portugal, during the necropsy of 32 dogs (17 males and 14 females, aged between 7 and 17 years) diagnosed with PD. Sampled animals died of natural causes or euthanasia, and were visually diagnosed with IE. Necropsy was performed in a surgically clean room, using adapted surgical techniques, within a maximum of 15 minutes after death [16–18]. All animal work was conducted according to relevant national (DL 113/2013 from 7 August 2013) and international laws (Directive 2010/63/UE).

Swabs were stored at 4°C and transported to the Laboratory of Microbiology and Immunology, Faculty of Veterinary Medicine, University of Lisbon, Portugal, where they were further processed for *Enterococcus* spp. isolation using conventional microbiological procedures [19]. From each sample, up to four typical single colonies presenting distinct morphologies were randomly selected for further characterization. Subsequently, to further confirm the allocation of the isolates as *Enterococcus* spp., PCR amplification was performed according to the method described by Ke *et al.* [20]. Identification at species level was performed by multiplex-PCR using species specific primers and conditions previously described [21] and the genomic relatedness between isolates of the microbial collection was further assessed by *Sma*I-macrorestriction analysis using Pulsed-Field Gel Electrophoresis (PFGE) [22].

Data generated was analysed using the BioNumerics 6.6 software (Applied Maths, Kortrijk, Belgium), which allowed the selection of enterococcal isolates present in both mouth and heart of the same animal; such enterococci were further characterized regarding antibiotic resistance to amoxicillin/clavulanate, ampicillin, chloramphenicol, ciprofloxacin, clindamycin, erythromycin, high-level gentamicin, imipenem, high-level streptomycin, tetracycline and vancomycin [23]. The presence of enterococcal virulence factors was screened by PCR amplification using primers and protocols previously described [24], [25]: genes coding for aggregation substance -agg-, the *E. faecalis* antigen A -efaAfs-, the *E. faecium* -efaAfm-, the enterococcal

surface protein -esp-, the pili-like -ebpABC-, gelatinase -gelE-, cytolysin activator -cylA- and the adhesins of collagen for *E. faecalis* -ace- and *E. faecium* -acm-. Additionally, plate assays for the evaluation of hemolytic and gelatinolytic phenotypes were also performed [26], as well as screening for biofilm-forming ability using microtiter-plate assays [27], [28].

Reference strains *Enterococcus faecalis* ATCC 29212 and *E. faecalis* MMH594 were used as controls, respectively for antimicrobial resistance characterization, and PFGE/virulence studies.

## Results and Discussion

From the 64 samples, 32 from each sampled site, a total of 35 were positive for the presence of *Enterococcus* spp., 21 mouth swabs and 13 from the heart. Overall, 117 enterococci were recovered after bacterial isolation, 99 belonging to the species *E. faecalis* and 18 identified as *E. faecium*. Subsequently, in order to assess for the genetic relatedness between enterococcal isolates *Sma*I-macrorestriction analysis was performed. For six of the sampled dogs PFGE-patterns observed for enterococci recovered from the mouth were distinct from those obtained from the heart (data not shown), but for seven of the 32 sampled animals PFGE-patterns were identical between mouth and heart enterococci obtained from the same dog (S1 Fig).

Considering that the same isolate was present in both the oral cavity and heart valves of dogs with PD and IE, this suggests the occurrence of enterococci dissemination between the animals' mouth and heart, as already described in human IE cases [6]. Although the hypothesis of contamination during necropsy or dissemination from intestinal microbiota could be considered, these do not seem possible in our study. As already mentioned, necropsies were performed using proper facilities and techniques, avoiding not only environmental contamination, which would result in a larger number of animals with similar isolates in both gum and heart samples, but also *post-mortem* spread of microorganisms [16–18]. In fact, *post-mortem* spreading from intestines would probably result in changes in the integrity of major organs, which were not observed.

These isolates also presented identical antimicrobial resistance and virulence profiles (Fig 1). Two putative virulence factors previously related with enterococcal endocarditis [15], [29] were observed in all isolates, namely the endocarditis antigen *efaA* and endocarditis and biofilm associated pili *ebpABC*. All isolates also showed the ability to produce biofilm, a major virulence factor related with IE pathogenesis [15]. Other putative virulence traits were also found, but not equally distributed amongst all isolates (Fig 1). All these features are mainly related to bacterial adherence and tissue degradation, crucial steps for IE development and establishment [15], [29], [30]. It is important to refer that this broad distribution of virulence factors amongst *E. faecalis* isolated from dogs' IE cases doesn't relate to which is observed in humans, since it has been stated that human endocarditis isolates are able to express less virulence determinants than non-endocarditis bacteria [31].

Regarding dog-associated enterococci antimicrobial resistance profiles (Fig 1), although all isolates were resistant to at least one antibiotic, none was resistant to the most used compounds in veterinary medicine for the treatment of IE promoted by Gram-positive bacteria, which include  $\beta$ -lactams and quinolones [1]. No multi-drug resistant profiles were observed, but two isolates were resistant to high-level streptomycin and other two were simultaneously resistant to high-level streptomycin and high-level gentamicin, representing a problem due to the possibility of bacterial dissemination to humans, as these compounds represent alternatives for the treatment of *E. faecalis* IE in human medicine [13], [15].

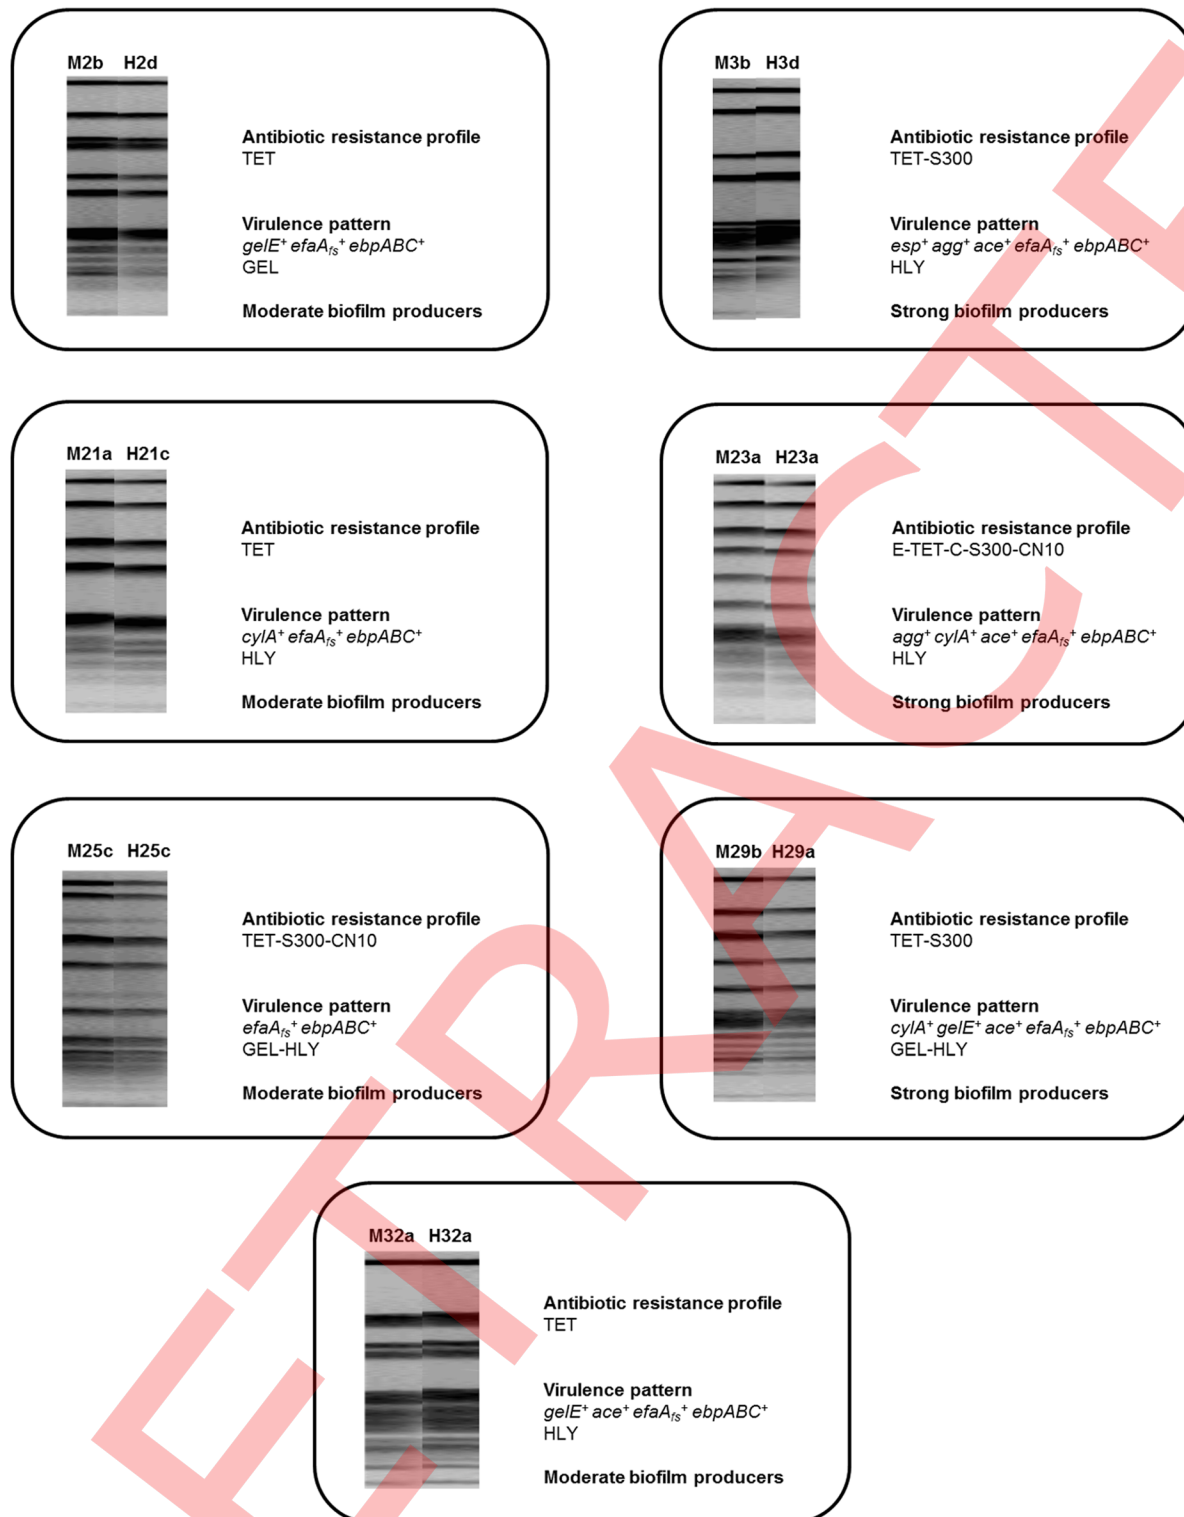

**Fig 1. Smal-macrorestriction patterns, antimicrobial resistance and virulence profiles of the enterococci clinical isolates.** M—mouth, H—heart, TET—tetracycline, S300—high-level streptomycin, E—erythromycin, C—chloramphenicol, CN10—high-level gentamicin, *gelE*—gelatinase coding gene, *efaA*—endocarditis antigen gene, *ebpABC*—endocarditis and biofilm associated pili gene, GEL—gelatinase production, *esp*—enterococcal surface protein gene, *agg*—aggregation substance gene, *ace*—collagen binding protein coding gene, HLY—hemolysin production, *cylA*—cytolysin activator gene.

doi:10.1371/journal.pone.0146860.g001

## Conclusions

This study allowed us to establish, to our knowledge for the first time, an unquestionable association between periodontal disease and bacterial-endocarditis in dogs. It also outlines the importance of characterizing oral infections caused by uncommon infectious microorganisms, as these can be underestimated and may evolve to severe disease such as IE. Therefore, veterinarians should always advise owners regarding at-home prevention measures for the safeguarding of the oral cavity health of their pets.

## Supporting Information

**S1 Fig. *Sma*I-macrorestriction patterns, antimicrobial resistance and virulence profiles of the enterococci clinical isolates.**

(DOCX)

## Acknowledgments

Authors would like to acknowledge Cláudia Miguel, DVM, for the access to the sampled animals, and Tiago Touret and Diana Gomes, for their help with the PFGE and disk diffusion protocols.

## Author Contributions

Conceived and designed the experiments: TSL BSB MO. Performed the experiments: TSL MT MO. Analyzed the data: TSL MT MO. Contributed reagents/materials/analysis tools: LT MO. Wrote the paper: TSL MT BSB LT MO.

## References

1. MacDonald K. Infective endocarditis in dogs: diagnosis and therapy. *Vet Clin North Am Small Anim Pract.* 2010; 40: 665–684. doi: [10.1016/j.cvs.2010.03.010](https://doi.org/10.1016/j.cvs.2010.03.010) PMID: [20610018](https://pubmed.ncbi.nlm.nih.gov/20610018/)
2. Cavaguchi DK, Pincelli VA, Bochio MM, Ribeiro RCS, Bracarense APFRL, Pereira PM. Aspectos clínico-patológicos e epidemiológicos da endocardite bacteriana em cães: 28 casos (2003–2008) / The clinicopathological and epidemiological aspects of bacterial endocarditis in dogs: 28 cases (2003–2008). *Semin Ciênc Agrár.* 2010; 31: 183–190.
3. Glickman LT, Glickman NW, Moore GE, Goldstein GS, Lewis HB. Evaluation of the risk of endocarditis and other cardiovascular events on the basis of the severity of periodontal disease in dogs. *J Am Vet Med Assoc.* 2009; 234: 486–94. doi: [10.2460/javma.234.4.486](https://doi.org/10.2460/javma.234.4.486) PMID: [19222358](https://pubmed.ncbi.nlm.nih.gov/19222358/)
4. Ito HO. Infective endocarditis and dental procedures: evidence, pathogenesis, and prevention. *J Med Invest.* 2006; 53: 189–198. PMID: [16953053](https://pubmed.ncbi.nlm.nih.gov/16953053/)
5. Inaba H, Amano A. Roles of oral bacteria in cardiovascular diseases—from molecular mechanisms to clinical cases: Implication of periodontal diseases in development of systemic diseases. *J Pharmacol Sci.* 2010; 113: 103–109. PMID: [20501966](https://pubmed.ncbi.nlm.nih.gov/20501966/)
6. Albuquerque C, Morinha F, Requicha J, Martins T, Dias I, Guedes-Pinto H et al. Canine periodontitis: The dog as an important model for periodontal studies. *The Vet J.* 2012; 191: 299–305. doi: [10.1016/j.tvjl.2011.08.017](https://doi.org/10.1016/j.tvjl.2011.08.017) PMID: [21940182](https://pubmed.ncbi.nlm.nih.gov/21940182/)
7. Okui A, Soga Y, Kokeguchi S, Nose M, Yamanaka R, Kusano N et al. Detection of identical isolates of *Enterococcus faecalis* from the blood and oral mucosa in a patient with Infective Endocarditis. *Intern Med.* 2015; 54: 1809–1814. doi: [10.2169/internalmedicine.54.3223](https://doi.org/10.2169/internalmedicine.54.3223) PMID: [26179542](https://pubmed.ncbi.nlm.nih.gov/26179542/)
8. Peddle GD, Drobatz KJ, Harvey CE, Adams A, Sleeper MM. Association of periodontal disease, oral procedures, and other clinical findings with bacterial endocarditis in dogs. *J Am Vet Med Assoc.* 2009; 234: 100–107. doi: [10.2460/javma.234.1.100](https://doi.org/10.2460/javma.234.1.100) PMID: [19119972](https://pubmed.ncbi.nlm.nih.gov/19119972/)
9. Niemiec BA. Periodontal disease. *Top Companion Anim Med.* 2008; 23: 72–80. doi: [10.1053/j.tcam.2008.02.003](https://doi.org/10.1053/j.tcam.2008.02.003) PMID: [18482707](https://pubmed.ncbi.nlm.nih.gov/18482707/)
10. Marshall MD, Wallis CV, Milella L, Colyer A, Tweedie AD, Harris S. A longitudinal assessment of periodontal disease in 52 Miniature Schnauzers. *BMC Vet Res.* 2014; 10: 166. doi: [10.1186/1746-6148-10-166](https://doi.org/10.1186/1746-6148-10-166) PMID: [25179569](https://pubmed.ncbi.nlm.nih.gov/25179569/)

11. Hoesley CJ, Cobbs CG. Endocarditis at the millennium. *J Infect Dis.* 1999; 179: S360–S365. PMID: [10081508](#)
12. Salah R, Dar-Odeh N, Hammad AO, Shehabi AA. Prevalence of putative virulence factors and antimicrobial susceptibility of *Enterococcus faecalis* isolates from patients with dental Diseases. *BMC Oral Health.* 2008; 8: 17 doi: [10.1186/1472-6831-8-17](#) PMID: [18513445](#)
13. Pericás JM, Zboromyrska Y, Cervera C, Castañeda X, Almela M, Garcia-de-la-Maria C et al. Enterococcal endocarditis revisited. *Future Microbiol.* 2015; 10: 1215–1240. doi: [10.2217/fmb.15.46](#) PMID: [26118390](#)
14. Ferreira FBA, Rabang HRC, Pinheiro ET, Gadê-Neto CR, Zaia AA, Ferraz CCR et al. Root canal microbiota of dogs' teeth with periapical lesions induced by two different methods. *Oral Surg Oral Med Oral Pathol Oral Radiol Endod.* 2006; 102: 564–570. PMID: [16997126](#)
15. Munita JM, Arias CA, Murray BE. Enterococcal Endocarditis: Can We Win the War? *Curr Infect Dis Rep.* 2012; 14: 339–349. doi: [10.1007/s11908-012-0270-8](#) PMID: [22661339](#)
16. Roberts FJ. Procurement, interpretation, and value of postmortem cultures. *Eur J Clin Microbiol Infect Dis.* 1998; 17: 821–827. PMID: [10052543](#)
17. Morris JA, Harrison LM, Partridge SM. Practical and theoretical aspects of postmortem Bacteriology. *Curr Diagn Pathol.* 2007; 13: 65–74.
18. Riedel S. The value of postmortem microbiology cultures. *J Clin Microbiol.* 2014; 52: 1028–1033. doi: [10.1128/JCM.03102-13](#) PMID: [24403308](#)
19. Semedo-Lemsaddek T, Nóbrega CS, Ribeiro T, Pedroso NM, Sales-Luís T, Lemsaddek A et al. Virulence traits and antibiotic resistance among enterococci isolated from Eurasian otter (*Lutra lutra*). *Vet Microbiol.* 2013; 163: 378–382. doi: [10.1016/j.vetmic.2012.12.032](#) PMID: [23375652](#)
20. Ke D, Picard FJ, Martineau F, Ménard C, Roy PH, Oullette M et al. Development of a PCR assay for rapid detection of enterococci. *J Clin Microbiol.* 1999; 37: 3497–3503. PMID: [10523541](#)
21. Jackson CR, Fedorka-Cray PJ, Barrett JB. Use of a genus- and species-specific multiplex PCR for identification of enterococci. *J Clin Microbiol.* 2004; 42: 3558–3565. PMID: [15297497](#)
22. Turabelidze D, Kotetishvili M, Kreger A, Morris JG Jr, Sulakvelidze A. Improved pulsed-field gel electrophoresis for typing vancomycin-resistant enterococci. *J Clin Microbiol.* 2000; 38: 4242–4245. PMID: [11060099](#)
23. Clinical and Laboratory Standards Institute (CLSI). Performance standards for antimicrobial disk and dilution susceptibility tests for bacteria isolated from animals; approved standard—fourth edition. VET01-A4. Vol. 33, N° 7; 2013.
24. Eaton TJ, Gasson MJ. Molecular screening of *Enterococcus* virulence determinants and potential for genetic exchange between food and medical isolates. *Appl Environ Microbiol.* 2001; 67: 1628–1635. PMID: [11282615](#)
25. Nallapareddy SR, Sillanpää J, Mitchell J, Singh KV, Chowdhury SA, Weinstock GM et al. Conservation of Ebp-type pilus genes among enterococci and demonstration of their role in adherence of *Enterococcus faecalis* to human platelets. *Infect Immun.* 2011; 79: 2910–2920.
26. Semedo T, Santos MA, Martins P, Lopes MF, Marques JFF, Barreto Crespo MT et al. Comparative study using type strains and clinical and food isolates to examine hemolytic activity and occurrence of the *cyl* operon in enterococci. *J Clin Microbiol.* 2003; 41: 2569–2576. PMID: [12791882](#)
27. Stepanović S, Cirković I, Ranin L, Svabić-Vlahović M. Biofilm formation by *Salmonella* spp. and *Listeria monocytogenes* on plastic surface. *Lett Appl Microbiol.* 2004; 38: 428–432. PMID: [15059216](#)
28. Extremina CI, Costa L, Aguiar AI, Peixe L, Fonseca AP. Optimization of processing conditions for the quantification of enterococci biofilms using microtitre-plates. *J Microbiol Methods.* 2010; 84: 167–173. doi: [10.1016/j.mimet.2010.11.007](#) PMID: [21081140](#)
29. Baldassarri L, Creti R, Arciola CR, Montanaro L, Venditti M, Di Rosa R. Analysis of virulence factors in cases of enterococcal endocarditis. *Clin Microbiol Infect.* 2004; 10: 1006–1008. PMID: [15522004](#)
30. Dahlén G, Blomqvist S, Almståhl A, Carlén A. Virulence factors and antibiotic susceptibility in enterococci isolated from oral mucosal and deep infections. *J Oral Microbiol.* 2012; 4: 10855.
31. Creti R, Imperi M, Bertuccini L, Fabretti F, Orefici G, Di Rosa R et al. Survey for virulence determinants among *Enterococcus faecalis* isolated from different sources. *J Med Microbiol.* 2004; 53: 13–20. PMID: [14663100](#)
